# Supplementary material for: Fungal Inhibition of Agricultural Soil Pathogen Stimulated by Nitrogen-Reducing Fertilization
Source: Front Bioeng Biotechnol. 2022 Apr 12;10:866419. doi: 10.3389/fbioe.2022.866419 (PMC9039341; doi:10.3389/fbioe.2022.866419)
Supplement: Supplementary file 3 [file DataSheet2.xlsx]

## Sheet: Data Sheet 1
OTU	CK1	CK2	CK3	RNTe1	RNTe2	RNTe3	RNTw1	RNTw2	RNTw3	RNTh1	RNTh2	RNTh3
OTU606	2	0	0	3	0	1	0	6	0	0	1	3
OTU444	0	0	0	0	3	0	0	0	0	0	0	0
OTU826	0	2	0	0	0	0	0	0	0	1	1	0
OTU914	1	0	0	0	0	0	0	0	0	0	2	0
OTU602	0	0	0	0	0	0	0	2	0	0	0	0
OTU264	1	3	1	0	0	0	0	0	0	0	0	0
OTU205	1	2	27	3	8	1	6	2	1	14	10	23
OTU461	1	0	0	0	0	1	0	0	0	0	0	0
OTU174	0	2	0	0	0	0	0	0	0	0	0	0
OTU465	0	0	3	0	0	3	0	0	2	0	0	0
OTU1003	7	1	3	1	0	0	0	2	5	13	4	29
OTU384	5	3	1	0	4	2	0	3	1	0	0	1
OTU466	2	0	0	0	3	10	0	1	0	0	0	0
OTU469	0	1	0	0	0	1	0	0	0	0	0	0
OTU505	6	6	7	0	3	0	4	6	3	7	4	4
OTU136	0	2	0	0	0	0	0	0	0	0	1	0
OTU500	0	3	1	0	2	0	8	5	1	1	2	1
OTU88	0	3	0	0	0	0	0	0	0	0	0	0
OTU175	0	2	1	0	0	0	0	0	0	0	0	0
OTU348	0	1	3	1	0	0	6	3	0	0	0	0
OTU265	0	2	1	0	0	0	0	0	0	0	0	0
OTU263	2	1	2	2	0	1	0	0	3	0	0	0
OTU261	0	1	1	0	0	0	0	0	0	0	0	0
OTU260	0	1	1	0	0	0	1	1	0	0	0	0
OTU250	0	0	9	0	0	0	0	0	0	0	0	0
OTU299	0	0	1	0	0	0	0	0	0	0	0	0
OTU509	0	0	0	0	0	0	12	0	1	0	0	3
OTU668	1033	1229	943	652	1184	857	1239	1116	930	1751	1566	1681
OTU816	0	0	0	0	0	0	1	0	0	1	0	0
OTU959	0	0	0	0	0	0	0	0	0	0	2	2
OTU930	0	16	0	0	0	0	0	0	0	0	12	0
OTU300	2244	2570	3116	7719	3186	1552	2964	2529	2746	1337	1705	3154
OTU316	0	0	0	1	0	0	0	1	0	0	4	1
OTU904	0	0	0	0	0	0	0	2	4	0	1	0
OTU950	0	0	0	4	9	1	1	0	1	10	2	5
OTU953	0	2	2	3	2	3	5	1	4	0	3	1
OTU134	0	1	1	0	0	0	0	0	0	2	4	1
OTU610	0	0	0	21	19	4	6	38	9	0	0	0
OTU834	0	2	0	0	0	0	0	0	0	3	0	0
OTU840	0	0	1	0	0	0	0	0	0	1	0	0
OTU937	0	0	0	0	0	0	0	0	0	0	1	0
OTU741	0	0	1	0	0	0	0	1	3	0	0	0
OTU869	0	0	0	0	1	0	0	0	0	11	1	2
OTU468	82	118	130	172	128	198	44	128	43	62	46	36
OTU170	8	8	7	1	0	0	0	1	1	0	0	0
OTU211	1	0	2	0	0	0	0	0	0	0	0	0
OTU216	2	6	8	0	4	3	5	3	1	2	3	2
OTU570	264	238	214	333	309	191	358	337	398	470	573	646
OTU219	0	0	3	3	1	1	1	2	0	0	2	0
OTU754	0	0	0	0	0	0	0	0	3	0	0	0
OTU715	1	0	0	0	1	0	0	0	3	0	2	0
OTU1039	1	0	3	0	0	0	1	1	2	6	0	2
OTU547	0	0	1	0	0	1	5	0	2	0	0	0
OTU740	0	0	0	0	0	0	0	1	5	0	0	0
OTU958	6	8	16	0	0	7	2	3	1	18	3	5
OTU71	31	31	38	0	0	0	0	1	0	0	1	0
OTU388	3	22	4	4	14	11	15	16	0	30	8	3
OTU492	7	2	3	7	0	2	4	4	1	1	9	0
OTU695	0	1	1	0	0	0	2	0	0	3	0	0
OTU472	3	6	4	30	22	20	1	1	3	5	4	5
OTU778	0	0	0	0	0	0	0	0	1	0	0	2
OTU474	1	0	1	1	2	2	0	0	0	0	0	0
OTU365	0	0	0	0	5	0	2	0	0	1	0	0
OTU794	12	54	133	107	47	139	572	462	356	389	126	83
OTU808	4	0	4	1	0	1	0	1	0	10	4	1
OTU233	14	7	21	10	6	12	39	29	42	55	37	32
OTU123	0	3	0	0	0	0	0	0	0	0	0	1
OTU282	0	1	4	0	0	2	0	0	1	0	0	0
OTU577	0	0	0	6	5	0	15	31	10	0	0	0
OTU10	83	109	97	20	44	16	37	107	166	31	163	50
OTU135	66	72	90	96	102	42	147	73	102	87	126	57
OTU32	7	6	6	3	0	0	0	3	0	0	0	0
OTU928	0	0	0	0	0	0	2	1	0	4	1	1
OTU178	2	12	16	12	2	10	18	6	20	0	2	0
OTU909	0	1	0	1	1	0	1	2	11	3	2	1
OTU327	0	0	0	5	0	0	0	0	0	0	0	0
OTU1038	0	0	0	1	0	0	0	1	0	0	0	1
OTU934	2	0	0	0	0	0	0	0	0	0	2	0
OTU99	0	1	0	0	0	0	0	0	0	0	0	0
OTU82	0	5	0	0	0	0	0	0	0	0	0	0
OTU269	231	296	358	145	88	37	120	127	115	178	199	153
OTU131	0	2	0	0	0	0	0	0	0	0	0	0
OTU130	1	5	0	0	0	0	0	0	0	0	1	0
OTU86	2	1	0	0	0	0	1	0	0	0	1	1
OTU87	0	2	0	0	0	0	0	0	0	0	0	0
OTU85	2	3	9	2	5	0	2	0	0	0	1	0
OTU962	283	336	253	76	62	65	116	69	121	270	261	274
OTU1010	115	31	50	51	59	85	133	154	169	304	314	368
OTU89	2	2	2	0	0	0	0	0	0	0	0	0
OTU371	2	1	0	7	5	4	6	1	3	2	2	1
OTU753	145	201	302	208	222	135	374	394	436	440	464	390
OTU646	0	1	3	1	1	1	255	2	5	100	5	9
OTU766	0	0	0	17	8	4	0	2	11	10	7	7
OTU241	0	0	3	0	0	0	1	0	0	0	1	0
OTU784	0	0	0	0	0	0	7	23	26	0	0	0
OTU63	1014	1396	1291	465	650	477	1162	1005	1140	1198	1146	1088
OTU583	1	1	0	0	2	0	3	1	0	0	0	0
OTU23	15	29	12	2	0	0	0	0	6	4	5	2
OTU487	0	1	14	38	52	34	1	0	1	0	0	0
OTU293	0	0	4	0	0	0	0	0	0	0	0	0
OTU105	0	3	0	0	0	0	0	1	1	2	0	0
OTU483	0	0	0	0	0	1	1	0	0	0	0	0
OTU480	0	0	0	0	0	3	1	0	1	0	0	0
OTU604	1	0	0	0	0	4	1	20	2	5	5	57
OTU148	2	1	0	0	0	0	1	0	0	0	0	0
OTU569	0	0	0	0	2	0	3	2	0	0	0	0
OTU74	7	3	1	3	2	0	6	1	8	8	0	12
OTU332	2	1	1	1	4	1	5	1	4	1	0	0
OTU702	0	0	0	0	0	0	0	0	3	0	0	0
OTU331	1	2	1	7	15	5	13	0	2	1	2	2
OTU218	0	0	3	0	0	0	0	0	0	0	0	0
OTU616	0	0	0	0	0	1	0	6	0	0	0	2
OTU45	16	9	34	11	1	0	0	0	0	4	1	2
OTU441	1	1	0	9	24	0	9	5	4	2	2	2
OTU537	6	6	1	0	0	0	7	3	3	4	19	3
OTU137	19	25	15	82	75	98	186	211	225	181	159	178
OTU956	0	0	0	1	0	0	0	0	0	0	2	1
OTU126	648	576	827	721	854	795	1345	688	767	859	374	248
OTU305	0	0	0	2	0	0	1	0	1	1	0	0
OTU723	0	0	0	0	0	1	0	0	1	0	0	0
OTU68	1	0	0	0	0	1	0	0	0	0	0	0
OTU381	13	0	0	35	17	0	1	0	0	0	53	8
OTU984	1255	1222	978	394	586	333	1052	849	800	1333	1336	1617
OTU600	0	0	0	0	0	0	0	3	0	0	1	0
OTU150	2	2	14	0	1	2	9	1	1	0	0	1
OTU226	0	0	1	0	0	0	0	0	0	0	0	0
OTU578	0	0	0	1	0	0	1	0	4	2	3	1
OTU217	5	6	7	0	0	0	2	0	0	0	3	1
OTU462	2	5	2	4	5	10	2	2	16	11	2	2
OTU249	0	0	1	0	0	0	0	0	0	0	0	0
OTU346	1	0	6	4	11	9	9	4	6	1	0	3
OTU498	0	0	0	0	0	0	10	0	0	1	1	0
OTU521	0	0	0	0	0	0	5	0	0	0	0	0
OTU1056	0	0	0	0	0	0	0	0	1	0	1	1
OTU35	4	6	13	7	3	4	45	22	18	70	68	111
OTU626	0	0	0	0	0	0	0	3	0	0	1	1
OTU431	0	3	0	0	1	6	4	5	2	3	0	4
OTU272	0	1	1	0	2	0	0	1	0	2	1	2
OTU712	2	0	39	3	0	2	0	29	6	4	0	0
OTU729	36	19	11	10	15	12	37	23	67	12	21	56
OTU139	16	16	18	6	6	9	14	16	12	4	7	9
OTU275	1	1	2	2	2	3	1	1	1	0	1	3
OTU108	0	3	1	0	1	0	2	0	0	0	0	1
OTU1055	0	1	0	0	2	0	0	0	0	0	0	3
OTU559	6	0	0	0	0	0	2	0	0	1	0	0
OTU428	0	0	0	0	2	0	0	0	0	0	0	0
OTU425	0	0	0	0	1	0	2	0	0	0	0	2
OTU495	482	585	586	408	256	125	629	1012	578	378	318	395
OTU676	0	0	0	0	0	0	2	1	0	0	0	0
OTU171	0	1	0	0	0	0	0	0	0	0	0	0
OTU72	56	88	66	27	106	43	163	59	36	14	5	23
OTU634	0	0	0	0	0	0	0	56	0	0	1	0
OTU862	0	0	0	0	0	0	1	1	1	39	0	0
OTU783	3	3	4	0	0	0	2	9	5	0	1	4
OTU98	1	4	5	12	12	4	14	5	5	27	3	4
OTU143	0	3	0	0	0	0	0	0	0	0	0	1
OTU890	8	17	30	0	4	0	16	18	5	42	56	26
OTU167	1	39	4	5	9	1	8	2	2	13	8	23
OTU683	0	0	0	0	0	0	0	2	0	1	0	0
OTU576	0	2	0	0	0	0	2	0	0	0	2	2
OTU176	5	13	3	2	1	3	1	3	5	1	2	0
OTU660	1	2	1	1	1	1	0	1	0	0	0	1
OTU528	0	0	0	0	1	0	2	2	0	2	0	0
OTU479	0	0	0	0	0	2	7	0	0	0	0	0
OTU800	0	0	1	0	2	0	0	0	0	14	0	1
OTU221	0	0	3	0	0	0	0	0	0	0	0	0
OTU95	1	9	0	0	0	0	0	0	0	0	0	0
OTU551	0	4	0	2	0	0	6	1	1	1	2	0
OTU588	0	0	0	0	0	0	2	0	0	0	0	0
OTU922	1	0	1	0	0	1	0	0	6	0	1	0
OTU403	0	2	1	0	3	1	0	0	0	0	0	0
OTU859	0	0	0	0	0	0	0	1	1	1	0	0
OTU471	0	0	0	0	1	2	0	0	0	0	0	0
OTU229	0	1	3	0	0	0	0	0	0	0	0	0
OTU786	6	1	3	6	5	1	8	7	7	7	7	6
OTU555	0	0	0	0	0	0	2	0	0	0	0	0
OTU787	0	1	0	0	5	0	1	0	12	0	1	0
OTU529	5	1	0	0	0	0	1	0	5	2	2	4
OTU642	0	0	0	0	0	1	0	1	0	0	0	0
OTU257	0	1	2	1	0	0	0	1	0	0	0	1
OTU255	2	1	1	0	1	0	2	1	0	2	2	0
OTU252	1	0	0	0	0	0	0	0	0	1	0	0
OTU944	3	10	3	13	2	0	1	8	17	6	7	14
OTU379	0	0	1	0	6	0	0	0	0	0	0	1
OTU270	0	0	1	0	0	0	0	1	0	0	0	0
OTU572	0	0	0	0	0	0	1	0	2	0	0	0
OTU140	1	2	0	0	1	0	3	0	1	0	1	0
OTU53	1	1	0	0	0	0	1	1	0	1	0	6
OTU161	1	1	0	0	0	0	0	0	0	0	0	0
OTU278	0	0	2	0	0	0	0	0	0	0	0	0
OTU895	0	0	0	0	0	0	0	3	0	0	33	0
OTU494	0	0	0	3	5	7	2	0	0	1	0	1
OTU746	0	0	0	1	0	0	5	0	1	1	0	0
OTU457	143	217	147	106	187	92	110	116	135	84	95	100
OTU923	0	0	0	0	0	0	0	0	0	0	1	0
OTU725	0	0	0	0	0	0	1	0	1	0	0	0
OTU16	1	1	0	0	0	0	7	1	0	0	0	0
OTU899	0	0	0	0	0	0	0	0	1	0	11	0
OTU955	0	2	0	0	0	0	0	0	0	3	9	4
OTU50	2	1	0	1	0	0	0	0	0	0	0	1
OTU595	1	0	1	1	0	0	2	4	1	0	1	0
OTU322	31	29	28	17	32	14	33	3	16	8	14	6
OTU118	0	2	2	0	0	0	0	0	0	0	0	0
OTU738	0	0	0	0	0	0	0	0	13	0	0	0
OTU224	0	0	5	0	0	0	0	0	0	0	0	0
OTU453	56	10	9	0	9	14	38	40	54	12	18	8
OTU1	3	0	1	0	0	0	0	0	1	1	4	1
OTU341	10	17	8	792	84	45	14	13	6	12	3	8
OTU666	3	7	7	6	0	2	6	6	0	5	5	11
OTU627	1	0	0	1	0	0	0	1	4	0	1	0
OTU370	56	93	62	52	383	20	109	67	75	43	20	60
OTU530	3	10	3	1	2	0	3	4	13	6	1	1
OTU372	1	0	1	0	1	0	0	0	0	0	0	3
OTU228	3	3	2	0	1	0	5	1	2	0	0	1
OTU374	1	0	1	0	3	0	3	0	0	0	2	0
OTU377	0	0	0	0	8	0	0	0	0	0	0	0
OTU38	2	0	0	0	0	0	0	0	0	0	0	0
OTU79	3	0	0	0	0	0	0	0	0	0	2	0
OTU227	1	0	2	0	0	0	0	0	0	0	0	0
OTU375	0	0	0	0	3	0	0	0	0	0	1	0
OTU173	0	1	0	1	0	0	0	1	0	0	0	1
OTU172	1	5	0	4	0	0	2	0	0	2	0	1
OTU607	0	0	0	5	6	0	0	189	3	0	0	0
OTU981	473	242	443	41	135	69	101	95	85	319	533	208
OTU601	0	0	0	0	1	0	0	1	0	0	0	0
OTU693	2	0	0	0	0	0	0	0	8	0	0	0
OTU354	170	309	230	1481	1509	1399	180	129	185	332	351	268
OTU620	0	1	0	0	0	0	5	2	2	12	2	0
OTU376	4	3	4	1	31	2	11	3	7	3	3	4
OTU686	39	48	25	17	19	13	33	41	22	50	40	60
OTU804	2	7	5	3	4	0	6	0	1	1	0	1
OTU814	0	0	1	0	0	0	0	0	0	2	2	1
OTU141	1	1	0	0	0	0	0	0	0	0	0	0
OTU700	0	0	0	2	0	0	0	0	2	0	0	3
OTU819	4	3	2	0	2	0	1	2	1	5	4	5
OTU285	0	0	51	0	0	0	0	0	0	0	0	0
OTU830	2	3	4	0	0	0	0	0	0	2	2	1
OTU524	0	0	1	0	0	0	5	0	0	0	0	0
OTU549	0	0	0	0	0	0	2	0	0	0	0	1
OTU325	6	9	5	30	9	3	4	7	3	6	1	1
OTU598	0	0	0	0	0	0	0	1	0	1	2	2
OTU877	0	0	0	0	0	0	0	0	0	2	0	0
OTU939	0	0	0	0	0	0	0	0	0	3	28	1
OTU997	4	4	7	4	5	1	7	2	1	4	5	30
OTU548	6	6	37	0	2	3	9	3	0	11	10	22
OTU856	0	1	0	1	1	2	3	14	3	8	10	3
OTU29	6	0	5	0	0	0	0	0	0	0	0	0
OTU473	0	0	1	0	0	1	0	0	0	0	0	0
OTU734	0	1	0	0	1	1	0	0	1	0	0	0
OTU57	1	0	0	0	0	0	0	0	0	0	0	2
OTU873	0	1	0	0	0	0	0	0	0	1	0	0
OTU426	289	306	444	494	372	1739	52	172	101	134	63	121
OTU961	5	10	0	23	3	0	22	7	2	11	14	15
OTU987	20	11	4	7	0	6	13	20	9	4	4	11
OTU177	0	3	0	0	0	0	1	2	0	0	0	0
OTU49	89	0	0	0	0	0	0	0	0	0	0	0
OTU751	1	1	0	0	0	0	0	1	19	0	0	0
OTU298	2	1	1	1	2	0	2	2	0	1	0	0
OTU582	51	68	53	34	42	20	131	50	52	6	2	10
OTU629	2	0	3	0	0	0	1	4	0	0	0	0
OTU52	411	357	392	437	415	169	341	418	505	350	367	412
OTU943	3	4	3	0	4	0	1	0	0	1	3	1
OTU286	1	0	4	2	0	0	1	0	0	2	0	3
OTU635	56	110	49	230	255	199	195	239	332	109	81	97
OTU617	8	28	32	5	7	2	9	7	14	13	17	25
OTU644	0	0	0	0	0	1	0	1	0	0	0	1
OTU329	0	0	0	4	0	0	0	0	0	0	0	0
OTU80	4	0	0	0	0	0	0	0	0	0	0	0
OTU750	7	5	10	0	2	2	25	23	13	12	13	13
OTU844	1	14	0	6	3	0	5	0	3	9	4	6
OTU552	0	0	0	0	10	0	19	0	1	0	0	1
OTU957	182	401	279	204	164	109	238	247	284	343	539	312
OTU1028	0	0	0	1	0	0	0	0	3	0	0	4
OTU302	0	0	3	0	0	0	0	0	0	0	0	0
OTU3	4	3	1	8	5	3	26	8	10	1	1	1
OTU891	423	383	404	111	71	196	279	798	217	748	1584	670
OTU573	0	0	0	0	0	0	5	0	0	0	0	0
OTU390	1	1	0	4	3	0	0	0	0	0	0	0
OTU647	1	4	10	9	10	8	5	17	11	5	3	14
OTU680	0	0	0	0	4	0	7	1	5	0	1	10
OTU337	0	0	0	2	2	3	0	0	0	0	0	0
OTU489	2	5	1	0	0	227	0	5	4	65	4	9
OTU54	5	0	0	0	0	0	0	0	0	0	0	0
OTU24	38	21	32	5	1	13	157	77	99	55	57	42
OTU149	12	8	17	0	4	4	15	13	11	24	7	22
OTU77	155	201	261	88	41	49	134	123	85	60	64	44
OTU797	70	98	92	89	131	48	156	124	129	301	30	26
OTU266	3	21	17	14	21	14	0	14	0	0	0	1
OTU203	69	36	57	22	33	9	30	33	23	23	28	38
OTU485	3	2	1	15	22	67	10	33	7	20	0	18
OTU454	4	0	2	0	0	2	0	0	0	0	0	0
OTU475	0	0	0	0	2	1	0	0	0	0	0	0
OTU658	28	28	82	16	8	21	54	43	90	54	64	34
OTU1049	2	0	1	0	0	0	2	4	0	0	0	1
OTU516	1	0	0	0	0	0	2	0	0	0	0	0
OTU43	4	0	0	0	0	0	0	0	0	0	0	0
OTU805	0	0	1	0	6	0	0	0	0	1	2	2
OTU326	136	156	179	232	120	129	220	181	263	107	41	310
OTU542	0	0	0	0	1	1	16	5	1	0	9	0
OTU735	62	57	62	67	36	31	37	50	42	47	45	32
OTU762	0	0	0	0	0	0	4	0	11	0	6	1
OTU75	10	0	0	0	1	0	0	0	6	4	0	0
OTU42	7	16	14	7	5	3	0	1	0	36	1	3
OTU638	0	0	1	15	12	10	8	16	16	51	12	12
OTU199	1	4	4	0	0	0	5	0	0	2	3	1
OTU4	7	2	0	2	0	0	0	0	0	0	0	0
OTU291	1	1	1	0	1	0	0	0	0	0	0	1
OTU771	353	371	890	196	104	131	250	703	1494	97	71	65
OTU294	0	0	2	1	0	0	0	0	0	0	0	0
OTU81	18	17	20	4	7	8	0	0	0	0	0	0
OTU284	0	0	11	0	0	0	0	0	0	0	0	0
OTU999	0	1	1	2	0	0	0	2	0	8	7	14
OTU825	4	5	4	0	1	1	11	1	2	3	8	4
OTU407	2	0	1	0	9	0	0	1	2	0	1	2
OTU501	2	4	2	3	0	0	4	1	3	3	2	1
OTU801	1	0	2	0	0	0	1	1	0	1	0	0
OTU575	0	0	0	0	0	0	2	0	0	0	0	0
OTU503	19	11	45	31	8	36	219	28	59	0	17	5
OTU120	0	4	0	0	0	0	4	0	0	1	0	1
OTU1027	6	1	2	4	1	2	0	2	2	8	2	2
OTU821	0	0	0	0	0	0	0	1	0	3	0	0
OTU951	0	0	0	1	1	0	0	0	0	1	1	2
OTU990	0	0	0	5	4	1	1	3	5	1	0	2
OTU244	0	0	8	0	0	0	0	0	0	0	3	0
OTU451	1365	1214	1198	1526	1983	1464	195	191	346	508	330	471
OTU755	42	18	41	23	32	14	56	58	70	76	47	37
OTU19	6	0	0	0	0	0	0	0	0	0	0	0
OTU168	0	4	1	0	0	0	0	0	0	0	0	0
OTU215	0	0	1	0	0	0	0	0	0	0	0	2
OTU301	0	0	6	0	0	0	0	0	0	0	0	0
OTU336	2	2	0	1	0	1	2	1	1	0	2	3
OTU330	2	3	3	6	3	1	2	3	6	1	8	8
OTU198	20	35	18	4	13	1	8	45	41	0	15	0
OTU339	1	3	6	6	2	1	1	3	0	0	1	4
OTU815	5	8	6	0	0	0	0	0	0	1	1	2
OTU396	0	0	0	0	2	0	1	0	0	0	0	0
OTU243	1	1	2	0	0	0	0	0	0	3	1	0
OTU539	0	0	0	0	1	0	1	0	0	0	0	0
OTU427	0	0	0	1	3	0	0	0	0	1	0	0
OTU591	0	0	0	0	0	0	2	0	0	0	0	0
OTU860	0	0	0	0	0	0	0	0	0	2	0	0
OTU851	0	0	0	0	0	0	0	0	1	1	0	1
OTU464	0	0	0	0	0	1	0	0	0	0	0	0
OTU490	0	0	0	1	1	2	3	1	0	0	0	0
OTU254	0	0	4	0	0	0	0	0	0	0	0	0
OTU1035	0	0	0	0	0	0	0	0	0	49	1	188
OTU442	0	0	0	0	1	0	1	2	3	0	1	0
OTU853	0	0	0	0	0	0	0	0	0	9	0	2
OTU852	1	0	1	0	0	0	0	0	0	1	0	0
OTU195	0	0	3	0	0	0	0	0	0	0	0	0
OTU380	0	0	0	0	2	0	0	1	0	2	0	0
OTU631	0	0	0	0	0	0	0	2	0	0	0	0
OTU718	0	1	1	1	1	0	0	2	1	0	0	0
OTU385	0	0	0	0	33	0	0	0	0	0	0	0
OTU387	0	0	1	0	1	0	0	0	0	1	1	0
OTU389	1	2	2	1	1	2	1	1	1	1	1	2
OTU343	0	0	0	11	0	0	0	0	0	0	0	0
OTU982	0	0	0	0	0	0	0	0	0	0	0	5
OTU187	1	1	2	0	0	0	0	0	0	0	0	0
OTU1022	4	1	6	4	2	2	2	19	5	10	10	8
OTU678	0	0	0	0	0	0	1	4	1	0	0	0
OTU144	0	1	0	0	0	0	0	3	0	0	0	0
OTU253	3	7	6	7	9	8	9	14	13	9	4	6
OTU421	0	0	0	0	2	0	0	1	2	0	0	0
OTU531	2	1	3	2	4	0	3	2	3	0	0	1
OTU769	4	8	2	3	9	2	5	3	14	8	8	10
OTU757	3539	3088	3524	2002	3444	1909	2929	2537	3162	1957	1670	1826
OTU532	1	0	0	0	0	0	6	0	0	0	0	0
OTU667	2	0	0	1	0	0	1	4	0	0	0	0
OTU237	5	10	4	11	23	9	13	9	10	37	22	14
OTU310	12	17	19	37	274	149	42	8	198	15	18	10
OTU946	0	3	0	2	0	3	15	3	6	16	16	15
OTU358	2	5	7	2	0	0	0	3	1	0	0	0
OTU779	0	0	0	0	0	0	4	10	9	0	0	0
OTU792	0	0	0	0	0	0	0	0	0	3	0	0
OTU654	0	0	3	0	0	0	0	1	0	0	0	0
OTU69	3	0	0	0	0	0	1	0	0	0	0	0
OTU61	12	0	0	0	0	0	0	0	0	0	0	0
OTU30	11	13	19	5	10	6	8	6	10	5	11	1
OTU41	3	0	0	0	0	0	0	0	0	0	0	0
OTU361	0	0	0	2	0	0	0	0	0	0	0	2
OTU581	24	15	39	7	7	5	20	26	12	3	9	6
OTU710	8	6	1	0	0	0	0	0	4	0	0	15
OTU742	2	3	7	0	1	0	8	10	5	0	1	2
OTU44	121	14	11	16	4	13	8	15	8	1	5	28
OTU533	0	1	0	0	0	0	2	1	2	0	0	0
OTU813	30	14	10	1	3	2	37	217	31	116	65	48
OTU34	3	1	8	0	1	1	4	0	1	0	0	1
OTU111	0	2	0	0	0	0	0	0	0	0	0	0
OTU113	0	2	2	0	4	0	1	2	0	0	0	1
OTU879	9	5	3	0	0	0	16	30	206	4	4	2
OTU363	0	0	0	0	2	0	0	0	0	0	0	0
OTU27	1	0	1	6	5	0	1	1	0	1	0	1
OTU708	0	0	0	0	0	0	0	0	3	0	0	0
OTU670	1200	898	828	2219	4136	2097	3353	2918	2213	1055	1211	1009
OTU1014	2	1	0	3	0	2	0	1	1	0	0	5
OTU704	1	0	0	0	0	0	0	0	1	1	0	0
OTU297	4	0	2	0	7	0	1	0	0	0	0	0
OTU707	0	0	0	0	0	0	4	0	3	0	1	1
OTU691	11	12	12	0	1	1	46	20	37	17	8	11
OTU283	5	5	21	10	3	45	2	2	9	1	8	46
OTU1043	3	2	3	0	2	0	4	2	10	0	2	23
OTU991	0	0	0	0	1	3	0	0	0	0	1	1
OTU13	4	0	0	0	0	0	0	0	0	0	0	0
OTU525	0	0	0	0	0	0	5	0	1	1	0	0
OTU84	0	2	4	0	0	0	0	0	0	10	4	14
OTU6	1001	726	677	86	47	25	1020	472	1945	309	711	368
OTU810	1	0	0	0	0	0	0	0	0	5	0	1
OTU767	0	0	0	0	0	0	0	0	4	0	0	0
OTU587	0	0	0	0	0	0	32	24	64	0	0	0
OTU527	0	0	0	0	0	1	9	0	0	0	0	0
OTU973	10	23	30	22	21	1	27	14	14	26	32	19
OTU651	0	0	0	0	0	0	0	2	0	0	0	0
OTU460	33	47	54	62	79	40	25	17	23	39	40	38
OTU1062	0	0	0	0	0	0	0	0	0	0	0	4
OTU103	1	1	1	0	0	1	0	0	3	1	2	0
OTU127	1023	844	1126	991	881	1399	825	171	154	143	285	235
OTU1040	1	0	1	0	0	2	0	1	0	2	4	3
OTU132	63	115	46	15	41	63	11	72	28	80	49	48
OTU902	0	0	0	0	0	0	0	0	0	0	2	0
OTU796	0	0	0	0	0	0	0	40	0	22	4	0
OTU239	1	6	9	0	1	0	4	0	4	2	1	0
OTU775	475	404	513	244	545	733	883	502	795	867	755	792
OTU970	20	15	24	0	1	0	30	34	33	10	23	17
OTU413	0	0	0	2	6	1	0	0	0	1	4	2
OTU415	0	0	0	0	2	0	3	1	1	0	0	1
OTU411	16	18	18	13	28	16	26	14	10	1	3	3
OTU417	0	0	0	1	2	0	0	0	0	2	9	0
OTU486	8091	10371	6439	8372	6427	4626	5601	6040	6394	6292	6324	6971
OTU823	0	17	0	0	20	0	0	0	0	50	2	0
OTU25	3	0	0	0	0	0	0	0	0	0	0	0
OTU56	11	27	11	2	2	2	4	4	3	13	9	12
OTU893	1195	1695	1680	1594	2074	1668	1404	1282	1575	1057	1032	1136
OTU112	39	112	56	46	20	13	28	47	23	12	65	60
OTU446	0	0	0	0	2	0	0	2	0	0	0	0
OTU342	0	1	1	2	0	0	0	0	0	0	0	3
OTU925	0	0	0	0	0	0	1	0	0	0	0	0
OTU829	8	14	14	17	2	6	9	5	6	16	8	11
OTU719	0	0	0	0	0	0	0	0	7	0	0	0
OTU828	11	2	16	10	0	11	9	1	6	4	3	0
OTU672	0	0	0	0	0	0	0	2	0	1	0	0
OTU732	2	1	1	0	0	0	8	3	12	5	6	2
OTU966	0	0	2	0	1	0	0	0	0	0	1	0
OTU942	0	0	0	0	0	1	1	0	2	5	3	0
OTU619	2	3	47	0	3	2	2	22	23	2	2	2
OTU1001	0	0	0	0	0	0	0	0	0	0	0	16
OTU200	589	629	522	287	268	260	218	210	167	111	123	294
OTU36	1	1	0	1	0	0	0	0	0	0	1	0
OTU186	0	6	29	9	2	0	1	2	1	0	0	0
OTU423	0	0	0	0	2	0	0	0	0	0	0	0
OTU209	4	4	14	1	4	0	0	0	2	14	11	7
OTU208	5	2	8	2	2	4	11	4	8	8	15	7
OTU565	5	6	6	29	30	11	21	9	19	4	3	2
OTU110	121	307	149	111	62	101	100	108	70	117	93	77
OTU892	8	15	142	51	8	5	18	10	15	501	44	48
OTU534	158	295	121	22	27	4	118	84	154	10	0	22
OTU256	1	0	2	0	0	0	0	0	0	0	0	0
OTU450	0	0	2	0	0	1	0	2	0	2	0	0
OTU117	0	1	0	0	0	0	0	1	0	0	0	0
OTU977	0	0	0	0	0	0	0	0	12	1	26	3
OTU455	0	0	0	0	7	1	0	0	0	0	3	3
OTU459	1	0	0	0	0	2	0	0	0	0	1	1
OTU613	0	0	0	5	4	6	3	8	0	0	0	0
OTU351	0	0	0	3	1	1	0	0	2	0	0	0
OTU467	4	5	1	4	3	2	7	7	3	2	4	4
OTU133	4	2	3	1	1	0	3	1	5	0	0	0
OTU436	151	200	291	853	886	2496	872	1755	859	312	403	365
OTU848	2	11	4	0	2	0	2	1	8	4	3	2
OTU861	0	0	0	0	0	0	3	0	0	3	1	0
OTU101	2	14	2	0	0	0	0	1	0	1	1	0
OTU878	5	7	3	2	11	5	30	12	8	23	25	20
OTU554	0	0	0	0	0	0	4	0	0	0	0	0
OTU46	1	1	0	0	0	0	0	0	0	0	0	0
OTU649	0	0	0	0	0	0	2	1	0	0	0	1
OTU855	0	0	0	0	0	0	0	0	0	4	4	2
OTU881	0	0	0	0	0	0	0	0	0	5	0	0
OTU220	0	2	9	0	1	1	0	0	0	0	0	0
OTU776	1743	748	411	80	104	108	147	48	56	89	110	139
OTU92	0	3	2	1	4	0	0	1	0	0	0	0
OTU129	0	2	0	0	0	0	0	0	0	0	1	0
OTU5	2	0	0	0	0	0	0	0	0	0	0	0
OTU876	0	4	2	0	1	1	9	2	0	8	2	2
OTU344	0	0	0	1	0	1	0	0	0	0	0	0
OTU345	0	0	0	2	0	0	0	0	0	1	0	0
OTU317	2	3	3	13	1	31	0	0	2	0	0	0
OTU880	52	61	89	5	4	11	9	28	7	8	36	24
OTU1006	4	0	0	0	0	0	0	0	0	17	0	29
OTU628	0	0	0	0	2	2	4	1	0	0	0	0
OTU585	1	24	8	16	9	24	17	12	8	12	17	21
OTU194	0	0	1	0	0	0	0	1	0	0	0	0
OTU382	0	0	0	0	2	0	0	0	0	0	0	0
OTU115	0	1	0	2	0	1	0	0	0	0	0	1
OTU918	0	0	0	0	0	0	0	2	0	0	1	0
OTU182	392	273	681	333	397	330	214	318	304	101	119	176
OTU520	0	0	0	0	0	0	3	0	0	0	0	0
OTU639	0	2	3	0	0	0	0	1	0	0	0	2
OTU290	1	0	2	0	0	0	1	1	0	0	0	0
OTU119	0	2	0	0	0	0	0	0	0	0	0	0
OTU214	1	3	1	0	0	0	2	0	0	0	0	0
OTU11	9	18	11	2	17	9	147	21	41	6	8	8
OTU798	0	0	0	0	0	0	0	0	0	1	1	0
OTU564	0	0	0	0	0	0	38	0	0	0	0	0
OTU630	10	12	10	11	97	4	49	19	14	9	7	23
OTU850	24	14	95	5	53	0	1	4	1	4	0	0
OTU632	2	8	5	4	3	0	3	2	0	0	0	2
OTU1029	0	0	0	0	0	0	0	0	0	0	0	2
OTU357	141	96	160	310	67	74	53	81	89	103	85	93
OTU55	2	0	0	0	0	0	0	0	0	0	0	0
OTU463	0	1	1	1	1	1	0	0	0	0	0	0
OTU152	0	3	0	0	0	0	0	0	0	0	0	0
OTU499	0	0	0	0	0	0	3	0	0	0	1	0
OTU9	3	0	0	0	0	0	0	0	0	0	0	0
OTU386	2	4	6	11	24	3	0	0	2	1	0	0
OTU739	0	0	2	1	1	0	0	0	5	0	0	0
OTU560	0	0	0	0	0	0	10	1	0	0	0	0
OTU645	0	1	0	1	2	0	9	9	3	0	0	2
OTU730	4	6	5	6	13	7	12	5	10	8	8	6
OTU64	2	0	0	0	0	0	0	0	0	0	0	0
OTU908	2	2	0	5	6	1	1	5	8	4	11	10
OTU1057	0	0	0	0	0	0	0	2	0	0	1	2
OTU496	0	0	0	0	0	0	12	7	3	0	0	0
OTU397	51	12	16	29	218	3	0	6	0	0	5	2
OTU280	0	0	2	0	0	0	0	0	0	3	1	1
OTU157	55	175	83	62	110	58	613	504	273	240	335	363
OTU391	0	5	3	1	10	5	9	6	4	1	1	2
OTU17	11	0	0	0	0	0	0	0	2	0	7	0
OTU2	2	3	14	4	3	0	1	1	0	0	4	1
OTU777	0	0	0	0	0	0	0	0	2	0	0	1
OTU399	4	2	1	5	5	0	6	2	2	0	1	2
OTU225	1	1	2	0	0	0	0	0	0	0	0	1
OTU484	4	8	4	9	10	17	11	6	18	3	1	0
OTU835	27	21	20	29	20	21	24	24	11	15	9	17
OTU151	0	3	0	0	0	0	0	0	0	0	0	0
OTU875	0	0	1	1	0	0	0	0	0	2	0	0
OTU153	1	6	4	0	0	0	0	0	4	0	0	0
OTU1052	0	0	0	0	0	0	0	0	0	0	0	2
OTU213	0	0	5	1	3	0	0	4	3	0	0	0
OTU478	1	0	1	1	0	8	0	0	0	4	0	1
OTU452	0	0	0	0	0	2	0	0	0	0	0	1
OTU748	1	1	0	0	3	0	1	0	1	0	0	1
OTU410	3	1	0	3	4	0	1	0	6	0	1	0
OTU661	73	69	27	31	97	1	53	31	76	37	66	116
OTU763	1	0	0	0	0	0	0	0	3	0	0	0
OTU795	0	0	0	0	3	0	0	0	0	4	0	0
OTU665	0	0	0	0	2	0	0	0	0	1	0	0
OTU868	0	0	7	0	0	0	2	1	0	5	4	3
OTU744	2	0	0	0	1	0	0	5	19	1	5	1
OTU768	65	30	39	7	15	8	71	60	158	50	32	23
OTU960	11	2	5	2	2	4	23	8	13	16	10	20
OTU1045	5	5	4	0	3	1	17	7	1	4	4	8
OTU159	2	2	0	0	0	0	0	1	0	0	1	1
OTU980	72	75	76	66	92	21	113	67	87	201	183	280
OTU824	0	7	3	0	1	4	0	0	0	5	4	5
OTU273	2	6	6	1	0	0	0	1	3	1	6	0
OTU222	0	0	1	0	0	0	0	0	0	0	0	1
OTU287	0	1	29	0	0	1	24	3	8	2	1	2
OTU433	451	573	778	219	368	195	1327	640	1031	925	1044	804
OTU1023	0	0	0	0	0	0	0	0	0	0	0	3
OTU106	0	4	0	0	0	0	0	0	0	0	0	0
OTU697	0	1	4	0	0	5	0	0	3	0	0	0
OTU37	3	0	0	0	0	0	0	0	0	0	0	0
OTU107	1	1	0	0	0	0	0	0	0	0	0	0
OTU714	0	1	0	3	0	0	25	4	4	0	1	2
OTU690	0	0	0	0	6	0	0	2	0	4	0	0
OTU419	33	12	16	2	144	2	144	96	4	96	147	151
OTU404	0	0	0	0	2	0	0	0	0	0	0	0
OTU886	30	54	52	48	73	21	14	37	44	38	46	45
OTU545	0	0	0	0	0	0	5	0	0	1	0	0
OTU696	5	13	7	32	27	13	7	4	20	4	9	1
OTU538	29	44	80	11	9	4	63	32	28	0	0	0
OTU70	1	2	1	0	0	0	0	0	0	0	0	1
OTU488	359	131	280	503	698	407	527	417	435	135	120	129
OTU827	0	0	0	1	1	1	0	0	0	9	0	0
OTU333	0	2	0	1	0	2	0	1	0	3	0	0
OTU1007	3	2	2	2	0	0	1	1	1	1	1	3
OTU597	6	0	6	4	4	3	0	24	12	0	2	0
OTU596	0	1	10	1	0	0	0	19	0	6	17	3
OTU790	0	0	0	0	0	1	0	2	0	1	1	1
OTU590	0	0	0	0	0	0	4	0	0	0	0	0
OTU184	0	0	4	0	0	0	0	0	0	0	0	0
OTU897	10080	10250	10298	10336	11139	20304	14599	18394	14834	22021	21319	19128
OTU618	1	0	1	0	0	0	0	2	1	0	0	0
OTU418	0	0	0	0	2	4	1	2	1	1	1	1
OTU476	0	1	0	0	0	1	0	1	0	0	0	0
OTU652	0	0	0	0	0	0	0	11	0	0	0	0
OTU561	10	2	3	4	4	2	4	8	5	0	4	2
OTU905	0	0	0	0	0	0	0	0	0	0	2	0
OTU843	2	0	8	0	2	0	0	1	1	2	1	0
OTU832	4	0	1	0	0	0	0	0	0	2	0	0
OTU443	0	0	0	0	3	0	0	0	0	0	0	0
OTU142	845	703	665	296	437	151	439	425	536	372	445	575
OTU544	2	4	2	0	0	14	22	5	8	6	5	1
OTU849	1	0	0	0	0	0	0	0	0	3	0	0
OTU191	0	0	3	0	0	0	2	2	0	0	0	0
OTU671	1	1	1	0	0	0	0	2	0	0	0	0
OTU566	0	1	0	0	1	0	15	0	2	0	0	1
OTU567	0	0	0	0	0	0	2	0	0	0	1	0
OTU608	0	3	0	1	1	0	0	2	1	0	3	0
OTU562	1	1	2	0	0	0	3	1	0	0	0	0
OTU245	0	0	7	0	0	0	0	0	0	0	0	1
OTU47	2	12	0	0	1	0	0	10	0	3	5	0
OTU26	2	1	2	3	0	0	0	1	0	5	0	0
OTU568	0	0	0	0	0	0	2	1	1	1	1	2
OTU948	322	320	381	466	495	283	453	525	490	549	472	372
OTU259	1	0	1	0	1	0	0	0	0	0	1	0
OTU809	1	1	0	0	0	0	0	0	0	2	1	1
OTU258	2	2	3	3	0	2	0	1	2	1	0	0
OTU1044	267	206	201	54	47	29	322	166	263	255	266	265
OTU889	2	0	0	0	1	0	0	0	0	0	12	0
OTU414	0	0	4	0	7	0	18	1	26	0	11	2
OTU393	52	19	60	44	134	23	61	117	135	123	173	229
OTU558	0	0	0	0	0	1	1	0	0	0	0	0
OTU736	13	1	7	4	41	1	21	3	2	17	9	12
OTU321	6	0	2	2	3	0	0	0	0	0	0	0
OTU838	0	0	0	0	0	0	0	0	0	4	0	0
OTU839	0	0	0	1	5	0	0	0	0	1	0	0
OTU900	0	0	0	0	0	0	0	0	0	0	2	0
OTU935	30	44	35	2	2	20	0	8	2	20	20	25
OTU513	15	10	12	19	20	7	31	5	16	6	2	1
OTU685	1	0	0	1	0	0	5	2	0	0	0	0
OTU842	0	0	0	0	1	0	0	0	0	3	0	0
OTU752	0	0	0	0	0	0	28	111	83	0	0	0
OTU28	1	0	0	12	0	0	0	0	1	0	0	2
OTU14	436	694	467	209	244	110	333	385	361	342	345	300
OTU405	0	0	0	0	4	2	0	0	0	0	1	0
OTU456	6	1	6	1	2	1	0	0	2	0	0	0
OTU887	2	2	0	1	0	1	1	1	1	4	1	1
OTU614	0	0	0	1	3	0	0	4	0	7	5	4
OTU589	0	0	0	0	0	0	2	2	0	0	0	0
OTU669	0	0	0	0	0	0	0	2	0	0	0	0
OTU837	0	4	0	0	0	0	0	0	0	3	0	0
OTU340	22	19	51	17	19	24	22	25	18	23	13	12
OTU898	0	0	0	0	0	0	4	0	4	0	2	1
OTU12	1	0	0	0	1	0	0	0	0	0	0	0
OTU726	1	5	0	0	0	0	0	0	0	0	0	0
OTU323	1	1	3	7	10	9	6	4	7	0	0	0
OTU989	0	4	0	0	0	2	0	0	0	2	0	3
OTU51	12	7	3	0	0	2	2	0	3	0	2	1
OTU303	0	0	35	0	0	0	0	0	0	0	0	0
OTU705	4	3	8	0	0	2	1	1	3	0	1	4
OTU1060	50	21	47	10	12	25	28	23	42	80	75	50
OTU276	0	0	6	0	0	0	0	0	0	4	0	0
OTU307	1	0	0	1	1	0	4	2	0	0	2	2
OTU841	0	0	0	0	0	0	0	0	0	2	0	0
OTU192	0	0	1	0	0	0	0	0	1	0	0	1
OTU846	7	10	14	3	0	0	9	13	26	72	81	30
OTU932	5	4	2	0	1	0	0	4	5	6	7	13
OTU33	2	0	0	0	0	0	0	0	0	0	0	0
OTU164	2	8	1	3	1	2	4	15	3	13	37	16
OTU202	4	0	3	0	0	0	0	0	0	0	0	2
OTU306	0	0	0	17	8	0	0	0	0	0	0	0
OTU553	0	0	1	0	0	0	3	2	0	0	2	1
OTU803	0	2	0	0	0	0	0	0	0	1	2	2
OTU793	0	0	0	1	3	5	0	0	1	4	2	0
OTU772	9	8	14	8	12	3	3	5	13	0	3	0
OTU373	0	0	0	0	1	0	0	0	0	1	0	0
OTU929	4	0	0	0	0	0	0	3	0	0	3	4
OTU1033	0	0	0	0	0	0	0	0	0	0	0	2
OTU747	164	206	400	88	53	104	260	142	217	214	371	259
OTU522	0	0	0	1	0	1	4	0	2	0	0	0
OTU675	0	0	0	0	0	0	0	4	1	0	0	0
OTU673	0	0	1	2	0	0	11	3	0	2	1	3
OTU181	462	319	275	50	139	51	314	133	169	343	320	615
OTU1030	0	0	0	0	0	0	0	0	0	0	0	3
OTU350	0	0	0	1	2	0	0	1	0	0	0	0
OTU356	1	0	0	1	0	0	1	0	0	0	0	0
OTU355	0	2	0	3	0	0	1	3	0	1	1	0
OTU940	0	0	0	2	0	0	0	0	2	1	2	0
OTU947	6	15	3	1	2	0	0	3	5	0	1	2
OTU507	302	302	180	254	725	337	358	558	371	295	222	718
OTU637	0	2	0	0	0	0	1	3	0	0	0	0
OTU709	0	0	5	4	0	0	4	3	11	0	2	2
OTU207	1	5	8	0	2	1	1	3	0	2	0	0
OTU945	0	0	0	0	0	0	0	2	1	0	1	0
OTU965	18	4	28	11	12	9	14	24	51	13	26	22
OTU400	0	0	0	0	1	0	0	0	0	1	0	2
OTU231	4	9	2	0	0	0	0	0	0	0	0	0
OTU238	0	2	1	2	0	0	0	1	0	0	0	0
OTU622	0	0	0	0	0	0	0	2	0	0	0	0
OTU593	0	0	0	0	0	0	3	2	0	1	0	1
OTU334	0	0	0	143	5	0	0	0	0	0	0	0
OTU550	0	1	0	0	0	0	5	0	3	0	0	0
OTU91	32	26	6	40	36	18	44	28	43	49	26	37
OTU831	0	0	0	0	0	1	0	0	0	1	0	0
OTU367	1	1	2	0	1	0	0	0	1	0	0	1
OTU623	0	0	1	0	16	34	0	6	0	0	0	0
OTU154	0	21	0	0	0	5	0	1	1	3	3	0
OTU304	2	2	1	2	0	0	1	5	0	0	4	0
OTU158	0	4	0	0	0	0	0	1	0	0	0	1
OTU1016	5	4	1	2	2	0	4	3	4	3	1	3
OTU128	5	2	0	0	0	0	0	0	0	0	0	0
OTU1047	12	13	19	15	9	7	10	6	23	43	237	95
OTU122	0	1	4	1	0	1	1	0	0	0	0	0
OTU586	0	0	0	0	0	0	3	0	0	0	0	0
OTU124	1	4	0	0	0	3	2	0	0	0	0	1
OTU1020	0	0	0	1	0	0	0	1	0	1	0	2
OTU90	0	3	1	3	0	2	4	1	1	0	0	3
OTU885	4	7	7	2	3	0	6	2	17	8	12	136
OTU659	0	0	0	0	0	0	0	1	0	0	0	0
OTU94	0	4	0	0	0	0	0	0	0	0	0	0
OTU571	0	1	0	4	0	1	15	1	1	0	0	0
OTU96	0	6	0	0	0	0	0	0	0	0	0	0
OTU223	2	1	10	1	7	0	4	3	2	2	2	2
OTU1012	0	0	0	0	1	0	0	0	0	0	1	1
OTU48	108	13	7	19	32	15	27	16	34	15	27	8
OTU657	1	1	0	0	0	1	1	2	1	0	0	1
OTU409	1	1	2	6	7	7	12	1	4	1	1	0
OTU655	1	3	0	1	2	0	0	3	0	0	1	1
OTU713	0	0	0	0	0	0	0	0	31	0	0	0
OTU39	2	0	0	0	0	0	0	0	0	0	0	0
OTU780	0	0	0	0	0	0	2	0	1	1	0	0
OTU663	142	349	261	310	386	187	259	461	356	315	149	166
OTU1025	0	0	3	0	0	1	11	0	0	0	0	4
OTU248	1	0	6	0	0	0	0	3	0	1	0	0
OTU1013	0	0	0	0	0	0	0	0	0	0	0	27
OTU920	0	0	0	0	0	0	0	0	0	0	2	0
OTU526	806	481	1758	3227	382	635	377	431	774	570	443	474
OTU698	3	3	3	2	5	0	4	3	3	2	0	3
OTU497	0	0	0	1	2	0	1	0	0	0	0	0
OTU20	1	1	0	0	4	0	0	1	0	1	0	0
OTU1031	0	0	0	0	0	0	0	0	0	0	0	1
OTU1037	3	3	5	17	6	13	6	9	16	7	29	11
OTU1034	0	0	0	0	0	0	0	1	2	0	0	1
OTU1036	3	4	4	2	1	0	2	6	3	2	1	5
OTU858	0	1	2	0	0	0	12	16	23	3	0	2
OTU711	0	0	0	0	0	0	0	1	12	2	1	1
OTU378	0	4	5	1	1	0	2	3	3	0	4	0
OTU662	19	0	5	1	0	1	0	2	0	4	12	1
OTU883	0	0	0	0	0	0	0	0	2	0	4	0
OTU884	0	0	0	0	0	0	0	0	0	0	2	0
OTU872	1	0	5	2	1	3	1	0	1	1	0	1
OTU518	45	1	66	2	8	0	1085	0	1	25	22	12
OTU440	2	1	1	0	3	0	2	1	0	0	0	1
OTU66	1	2	3	1	0	0	2	2	1	0	1	2
OTU774	0	0	1	0	0	0	1	4	7	0	0	0
OTU445	0	0	0	0	2	0	0	0	0	0	0	0
OTU799	0	0	0	0	0	0	6	0	2	10	2	3
OTU169	0	4	1	0	0	0	0	0	0	0	0	0
OTU308	0	3	0	2	3	0	1	0	1	5	14	2
OTU857	7	7	15	6	12	1	4	5	3	24	6	9
OTU1019	0	0	0	0	0	0	0	1	0	0	0	2
OTU338	0	0	0	3	0	1	0	0	0	0	0	0
OTU724	0	0	0	2	2	6	11	12	11	0	0	0
OTU888	10	4	1	3	7	1	0	3	4	2	12	2
OTU761	3	0	0	0	6	0	6	2	3	1	11	2
OTU289	1	0	2	0	0	0	0	1	0	1	0	2
OTU986	0	0	9	0	2	0	0	0	6	9	24	8
OTU927	1	0	1	1	0	0	0	8	0	0	32	0
OTU179	5	3	5	6	6	2	4	13	1	5	4	4
OTU694	148	92	198	348	70	93	51	92	110	108	109	71
OTU743	6	3	0	1	0	0	39	7	8	6	3	4
OTU8	16	5	15	0	0	0	5	4	2	0	1	0
OTU919	0	0	0	0	0	0	0	0	0	0	3	0
OTU870	5	5	0	6	3	0	2	1	2	6	5	2
OTU976	0	0	0	0	0	0	1	1	0	0	1	0
OTU931	0	0	2	3	0	0	2	1	0	11	19	8
OTU974	0	2	0	0	1	0	9	0	2	1	7	4
OTU806	0	0	0	1	0	13	0	0	0	3	0	1
OTU557	0	1	1	0	1	0	7	1	1	0	0	0
OTU882	32	19	27	39	17	16	14	25	20	20	18	27
OTU116	2	2	8	6	3	2	9	4	3	5	5	2
OTU770	0	2	3	1	1	1	2	3	8	2	5	4
OTU979	0	0	0	0	0	0	0	0	0	0	0	3
OTU978	6	0	0	0	3	3	0	0	0	0	103	0
OTU234	0	0	3	0	0	0	0	0	0	0	0	0
OTU235	0	1	5	0	0	0	0	0	0	0	1	0
OTU236	0	2	2	0	0	1	0	1	0	0	1	2
OTU985	6	4	5	1	1	0	9	14	12	22	10	16
OTU964	0	0	0	1	0	3	3	1	2	2	32	1
OTU894	0	0	0	0	0	0	2	0	0	1	1	1
OTU246	3	0	0	0	0	1	0	2	1	1	1	2
OTU364	2	4	3	0	1	1	1	0	5	2	0	1
OTU504	0	0	0	0	0	0	2	0	0	0	0	0
OTU416	92	139	57	8	39	20	47	24	31	70	73	122
OTU514	0	0	0	0	0	0	3	0	0	0	0	1
OTU247	0	0	2	0	0	0	0	0	0	0	0	0
OTU447	4	0	2	0	1	0	0	0	1	1	0	0
OTU811	31	59	69	91	95	982	178	186	229	272	167	139
OTU543	0	1	0	0	0	0	1	1	4	1	0	0
OTU679	647	823	1113	681	1052	1916	768	1006	1409	1424	1585	1373
OTU717	0	5	0	0	0	0	6	0	1	0	0	0
OTU998	0	2	0	0	0	0	0	0	0	0	0	6
OTU206	0	0	4	0	0	0	1	1	0	0	0	0
OTU352	0	0	0	4	3	1	1	3	3	1	2	4
OTU15	4	5	1	4	1	6	2	3	2	0	0	1
OTU692	0	2	0	1	3	4	3	2	2	0	1	0
OTU903	0	0	0	0	0	0	1	0	2	7	5	3
OTU901	0	0	0	0	0	0	1	0	1	0	1	2
OTU907	0	0	0	1	1	0	1	1	0	0	2	1
OTU938	1	1	2	0	0	5	5	0	0	5	2	0
OTU936	0	0	2	0	2	0	1	0	0	0	1	0
OTU493	0	0	0	0	0	0	1	0	0	0	0	0
OTU189	17	33	55	32	24	32	11	21	20	21	25	30
OTU422	0	0	0	0	1	0	0	0	3	0	0	0
OTU210	24	90	37	6	8	5	14	14	8	51	72	45
OTU1009	1	0	0	0	0	0	0	0	0	2	0	4
OTU201	12	31	21	2	0	0	9	2	3	0	0	0
OTU765	0	0	0	0	0	0	0	0	17	0	0	0
OTU402	282	460	464	107	144	99	501	316	798	336	429	250
OTU62	18	33	25	6	15	11	12	9	5	20	20	13
OTU636	0	0	0	0	0	0	0	2	0	0	0	0
OTU392	28	43	45	21	37	19	31	53	50	15	16	7
OTU625	0	1	0	2	2	4	1	6	1	0	1	1
OTU556	0	0	0	0	0	0	2	0	0	0	0	0
OTU360	0	0	2	2	1	0	0	0	0	0	0	0
OTU921	0	0	2	0	2	1	7	11	10	9	11	7
OTU394	0	0	0	22	1435	26	0	0	0	0	0	0
OTU511	2	0	0	0	0	0	3	0	0	0	0	1
OTU412	4	0	2	0	5	0	9	9	11	0	0	0
OTU781	131	133	250	29	44	34	132	127	191	101	83	94
OTU996	11	9	7	18	30	18	34	13	8	11	6	23
OTU318	0	0	0	2	0	0	0	0	0	0	0	0
OTU97	0	6	1	0	0	0	0	0	0	0	0	0
OTU315	0	0	0	1	0	0	0	0	0	0	0	1
OTU314	0	0	0	1	3	2	0	0	0	0	1	0
OTU313	3	1	0	1	0	2	0	2	0	0	0	1
OTU968	3	12	9	4	2	9	5	2	5	12	8	1
OTU311	0	0	0	4	0	0	0	0	0	0	0	0
OTU510	0	0	0	0	0	1	1	0	0	0	0	0
OTU73	3	0	1	0	1	0	1	0	0	0	0	0
OTU1064	0	0	0	2	0	1	4	0	1	7	2	5
OTU822	0	0	0	0	0	0	0	0	0	11	0	0
OTU972	0	0	0	2	4	0	0	0	0	0	2	0
OTU1053	4	4	8	4	9	5	18	11	30	2	7	38
OTU512	4	0	1	0	1	0	5	1	1	0	1	4
OTU773	0	0	0	0	0	0	0	0	3	0	0	0
OTU733	0	0	0	0	0	0	0	0	1	3	0	0
OTU21	3	1	0	0	0	0	0	0	0	0	0	0
OTU22	2	0	1	0	0	0	0	0	0	0	0	0
OTU967	0	1	0	0	1	0	2	0	0	0	1	1
OTU262	1	2	3	0	0	1	3	0	1	0	1	0
OTU788	0	0	0	0	0	0	0	2	3	3	2	0
OTU540	0	0	0	0	0	0	3	6	2	0	0	0
OTU212	1	4	2	0	2	0	0	0	0	1	2	2
OTU470	2	1	4	0	1	0	0	1	0	0	0	0
OTU1058	0	0	0	0	0	0	0	0	0	0	0	2
OTU83	0	2	0	0	0	0	0	0	0	0	0	0
OTU368	0	0	0	0	2	0	0	0	0	0	1	0
OTU971	1	0	0	0	0	1	2	1	4	0	2	2
OTU439	0	0	0	1	1	0	0	0	0	0	0	0
OTU432	0	0	1	0	5	0	0	25	1	0	4	0
OTU701	0	0	0	0	0	0	0	0	1	0	0	0
OTU193	0	0	1	1	1	0	0	1	3	2	0	0
OTU812	7	5	3	0	1	0	1	2	13	10	1	3
OTU807	1	1	0	0	0	0	0	0	0	2	0	1
OTU362	0	0	6	1	0	0	0	0	0	0	0	0
OTU335	0	0	0	9	0	0	0	0	0	0	0	0
OTU760	0	0	0	0	0	0	0	0	3	0	0	0
OTU160	0	4	0	0	0	0	0	0	0	0	0	0
OTU162	0	0	1	0	0	0	0	0	1	1	1	0
OTU983	0	0	3	2	0	3	0	0	0	1	0	3
OTU975	0	2	0	0	0	0	1	0	1	0	4	2
OTU65	20	4	2	0	0	0	0	0	1	0	0	0
OTU650	0	0	0	0	0	0	2	2	0	0	0	0
OTU612	0	0	0	0	0	0	0	1	0	4	0	0
OTU969	3	0	1	0	0	0	2	1	0	1	1	0
OTU430	0	2	0	3	2	1	0	1	1	0	1	0
OTU758	0	0	0	0	0	0	0	0	6	0	0	0
OTU147	0	5	0	0	0	0	0	0	0	0	0	0
OTU76	25	1	21	0	0	0	21	7	11	2	6	4
OTU230	391	514	924	1893	432	183	840	380	730	680	989	720
OTU833	74	56	65	20	16	15	102	64	49	147	32	22
OTU1050	5	5	6	0	0	0	5	5	14	158	43	63
OTU759	0	0	0	0	0	0	1	0	3	0	0	0
OTU180	2	1	1	0	0	1	4	1	3	0	1	0
OTU1063	0	0	0	0	0	0	0	0	0	0	0	2
OTU906	0	0	0	0	0	0	0	0	0	0	5	0
OTU67	0	1	0	0	0	0	0	0	0	0	1	0
OTU312	0	0	0	2	0	0	0	0	0	0	1	0
OTU449	2	1	1	1	6	1	2	2	3	1	3	1
OTU917	31	27	3	2	15	7	7	4	4	13	17	16
OTU121	0	6	0	1	0	0	0	6	0	0	0	0
OTU1048	0	9	0	0	0	3	3	13	0	0	4	13
OTU196	0	0	1	1	0	0	0	0	0	0	0	0
OTU406	0	0	0	0	9	0	0	1	11	0	1	1
OTU102	1	15	1	0	0	0	0	0	0	0	0	0
OTU40	1	4	0	3	3	0	0	2	0	1	1	0
OTU251	10	25	42	0	0	0	0	0	0	0	0	0
OTU546	0	0	0	0	0	0	20	0	0	0	0	0
OTU271	4	5	5	1	0	0	1	0	0	0	1	1
OTU1024	0	0	0	0	0	0	0	0	0	1	0	2
OTU408	0	0	0	1	11	0	6	2	1	0	1	0
OTU7	2	1	0	1	0	0	1	1	0	0	1	0
OTU398	0	0	0	1	1	2	2	1	0	0	1	0
OTU1002	0	0	0	1	0	0	5	1	0	1	0	44
OTU1000	2	1	1	16	16	2	8	12	11	12	2	7
OTU185	3	0	12	1	3	2	0	0	0	0	1	1
OTU458	5	0	11	1	0	10	0	0	1	0	0	0
OTU682	0	0	0	2	0	0	0	3	0	1	1	1
OTU242	29	29	23	11	1	0	17	8	8	20	25	69
OTU18	15	8	10	0	6	4	0	0	0	0	0	0
OTU594	0	0	0	0	0	0	0	2	0	0	0	1
OTU687	2	3	3	0	5	0	2	2	4	2	2	2
OTU867	0	1	0	1	0	1	0	0	0	1	0	0
OTU579	1	3	0	0	0	0	2	0	0	0	0	0
OTU429	0	1	0	0	6	0	2	2	13	0	3	1
OTU477	1	1	0	1	0	2	3	0	1	0	1	2
OTU802	1	4	5	0	1	2	0	0	1	3	0	0
OTU296	0	0	3	0	0	0	0	0	0	0	0	0
OTU640	0	0	0	0	0	0	0	1	0	0	0	0
OTU523	257	146	138	21	45	53	203	82	76	232	222	238
OTU420	6	13	8	29	42	6	36	31	16	30	32	58
OTU104	0	1	2	3	2	5	2	0	6	0	1	0
OTU574	1	0	1	0	0	1	1	0	0	0	0	0
OTU295	1	1	2	2	0	1	6	16	11	2	0	2
OTU448	36	15	22	18	29	5	16	14	19	52	13	22
OTU274	17	131	42	0	0	0	6	2	1	0	0	0
OTU603	0	0	0	0	0	0	0	8	2	0	0	0
OTU292	2	0	4	0	0	1	7	1	2	0	6	1
OTU684	2	1	4	5	15	0	19	83	60	4	3	0
OTU279	5	8	4	0	0	0	0	0	0	1	0	0
OTU109	0	3	0	0	0	0	0	0	0	0	0	0
OTU502	2	0	6	1	0	3	11	10	7	25	0	4
OTU731	3	0	0	0	1	2	5	3	3	3	0	6
OTU232	9	15	201	0	6	0	0	0	0	3	0	0
OTU656	2	8	0	0	0	1	4	29	6	4	0	7
OTU949	0	0	0	0	0	0	0	0	0	0	1	0
OTU818	0	0	0	0	0	0	0	0	0	3	0	2
OTU146	0	16	0	0	0	0	0	0	0	0	0	0
OTU912	0	0	0	0	0	0	0	0	0	0	3	0
OTU138	0	2	0	0	0	0	0	0	0	0	0	0
OTU764	0	0	0	0	0	0	1	0	0	0	0	0
OTU93	5	8	13	1	0	1	7	8	16	1	1	2
OTU621	0	0	0	0	0	0	0	5	0	0	0	0
OTU988	3	8	1	0	5	1	2	2	1	0	0	7
OTU1021	4	1	1	0	0	0	0	1	0	1	1	3
OTU515	0	0	1	0	0	0	5	0	0	0	0	1
OTU268	0	0	1	2	0	0	0	0	2	0	0	0
OTU114	0	18	2	0	0	0	0	0	0	0	0	0
OTU434	0	0	0	0	2	0	0	0	0	0	0	0
OTU1004	13	9	6	6	5	20	10	15	12	12	16	12
OTU1042	0	0	0	0	0	0	0	0	0	0	0	3
OTU954	0	1	0	4	0	0	0	0	0	2	1	0
OTU817	0	0	0	0	0	1	0	0	0	4	0	3
OTU791	0	1	0	0	0	0	0	0	2	12	7	2
OTU482	0	0	0	5	0	5	0	0	0	0	0	0
OTU580	0	0	0	2	0	0	1	0	0	0	1	0
OTU277	288	330	147	49	59	86	9	16	10	1	16	17
OTU506	56	58	77	35	47	20	129	88	39	26	17	34
OTU369	85	120	110	67	21	20	50	42	83	108	80	50
OTU963	0	3	1	0	0	0	4	2	9	1	13	6
OTU615	7	4	37	6	1	3	23	14	17	22	11	21
OTU1032	0	0	0	0	0	0	0	0	0	0	0	2
OTU204	0	0	4	0	0	0	0	0	0	0	0	0
OTU911	0	0	0	0	0	0	0	0	0	1	1	1
OTU913	0	0	0	0	0	0	0	0	0	0	3	0
OTU491	0	0	0	0	1	0	0	0	0	0	1	0
OTU915	0	0	0	0	0	0	0	0	0	0	2	0
OTU845	1	0	4	0	0	0	0	0	0	1	1	1
OTU749	4176	4491	4472	3414	4159	3640	423	356	677	301	376	776
OTU865	2	9	5	17	21	3	7	3	3	1	3	3
OTU508	0	0	0	0	0	0	10	6	2	0	0	0
OTU166	1	7	4	0	0	1	2	2	0	3	0	1
OTU941	0	0	0	0	0	0	0	0	0	0	2	0
OTU653	2672	302	412	91	80	11	207	292	254	573	839	628
OTU916	1	2	2	0	0	0	0	0	0	1	1	0
OTU125	0	2	0	0	0	0	0	0	0	0	0	0
OTU1017	0	0	0	0	0	0	0	0	0	0	0	3
OTU517	1	7	13	3	1	1	2	0	2	3	4	2
OTU609	10	20	13	4	3	7	130	104	135	1	4	0
OTU1018	1	1	0	0	0	0	0	0	0	0	0	1
OTU60	9	25	12	0	0	0	0	1	0	0	0	0
OTU674	0	3	1	0	1	0	1	1	0	2	0	0
OTU896	0	0	6	0	0	0	0	0	0	0	3	0
OTU320	8	9	14	19	0	1	6	3	10	18	7	8
OTU324	0	0	0	3	0	0	0	0	0	0	0	0
OTU519	0	1	3	0	0	1	3	6	2	0	0	0
OTU319	0	1	0	1	0	0	2	2	0	2	7	0
OTU1051	4	1	90	2	43	4	31	30	22	63	8	58
OTU599	0	0	0	0	0	0	0	31	0	0	0	0
OTU624	170	41	54	25	47	23	92	405	124	169	180	149
OTU347	33	18	53	135	14	19	17	30	38	13	19	23
OTU854	0	0	1	0	0	0	1	1	0	2	0	0
OTU240	13	1	5	4	11	0	1	1	2	4	0	0
OTU267	0	0	2	0	0	0	0	0	0	0	0	1
OTU664	0	0	4	0	0	0	0	3	2	0	0	0
OTU641	3	1	0	0	0	0	14	12	1	0	0	0
OTU395	0	0	1	0	4	1	2	2	0	0	0	0
OTU435	0	0	0	0	2	0	0	0	0	0	0	0
OTU156	16	19	12	7	5	2	13	12	1	9	16	16
OTU847	0	0	0	0	0	0	0	0	0	30	4	10
OTU31	5	5	10	7	3	3	7	1	1	1	3	4
OTU1054	0	0	0	2	0	0	0	3	1	2	8	9
OTU165	4	6	0	0	0	1	0	0	0	10	0	0
OTU722	0	0	0	0	0	0	0	0	3	0	0	1
OTU782	0	0	0	3	0	0	1	2	11	0	0	0
OTU611	0	0	0	0	0	1	0	4	0	0	0	0
OTU592	0	0	0	0	0	0	1	2	0	2	0	1
OTU866	0	0	0	0	0	0	0	0	1	1	0	0
OTU309	0	0	0	10	7	9	0	0	0	0	0	0
OTU820	2	0	3	0	3	1	0	1	5	3	2	2
OTU648	93	133	110	107	105	58	396	179	145	220	152	305
OTU288	0	0	1	0	0	0	0	0	0	0	0	0
OTU1061	0	1	0	0	0	0	0	0	0	0	0	1
OTU689	5	0	0	1	1	0	2	1	2	0	0	1
OTU688	4	8	16	0	0	0	0	1	4	5	10	25
OTU328	1	2	5	11	4	0	4	8	1	3	3	1
OTU359	0	0	0	1	0	0	0	1	0	0	0	0
OTU716	0	4	4	23	6	1	66	61	37	14	6	2
OTU563	0	0	0	0	0	0	4	0	0	0	0	0
OTU933	11	24	14	6	14	6	2	4	13	29	33	65
OTU353	30	35	49	30	26	6	61	65	48	107	148	196
OTU737	0	1	1	0	0	0	0	4	5	0	1	0
OTU720	0	0	0	0	0	0	0	0	2	0	0	0
OTU721	1	0	0	0	5	0	0	0	9	0	0	0
OTU727	0	0	0	0	0	0	0	3	15	0	0	0
OTU1008	3	3	5	3	3	4	5	2	2	2	2	3
OTU756	5	0	3	0	3	0	40	2	26	3	0	0
OTU59	23	9	37	0	0	0	0	0	0	3	2	4
OTU1026	26	48	15	9	25	11	55	74	68	27	25	20
OTU58	1	0	0	0	0	0	0	0	0	0	1	0
OTU706	18	28	17	10	16	11	34	22	39	78	51	61
OTU952	4	6	1	0	1	3	5	2	12	15	21	10
OTU541	1	2	3	5	10	10	17	4	2	4	3	1
OTU1011	47	55	23	7	31	0	56	70	82	267	210	143
OTU197	11	35	35	15	2	10	4	5	11	9	6	6
OTU383	10	7	5	4	4	3	2	0	1	0	0	0
OTU993	0	2	3	1	0	0	0	0	0	0	0	2
OTU992	1602	1195	778	1623	2370	3372	956	1616	1298	466	384	470
OTU78	14	18	32	1	2	3	37	5	8	44	53	47
OTU605	22	21	35	1	3	0	2	16	28	0	14	9
OTU728	0	0	0	0	2	1	1	0	1	0	0	0
OTU910	735	352	248	83	151	207	187	124	188	272	263	535
OTU481	2	0	0	0	2	1	0	2	0	0	0	0
OTU1041	0	0	0	0	4	0	0	0	0	2	0	1
OTU1005	0	0	0	0	0	0	0	0	0	0	1	1
OTU1046	0	0	0	0	0	0	0	0	1	0	0	1
OTU188	1	0	3	0	0	0	1	0	0	1	0	0
OTU924	0	0	0	37	105	59	0	0	0	61	181	252
OTU1015	0	0	0	0	0	0	0	0	0	0	1	1
OTU995	0	1	0	0	0	0	0	2	3	0	0	2
OTU681	3	6	0	3	0	1	0	4	5	0	0	0
OTU584	0	0	0	0	0	0	3	0	0	0	0	0
OTU163	3	12	25	1	1	0	1	2	0	2	0	1
OTU438	1	1	0	1	1	3	3	0	0	0	0	0
OTU145	461	640	729	86	141	111	209	283	208	105	201	324
OTU437	0	0	0	0	1	0	0	1	3	1	1	1
OTU677	1	1	0	0	0	1	0	3	1	0	0	0
OTU281	3	8	25	0	0	0	0	0	0	0	0	0
OTU745	0	0	0	0	0	0	0	0	4	0	0	0
OTU836	1	6	0	2	8	0	6	1	4	6	2	5
OTU536	1	0	1	0	1	1	16	1	0	0	0	3
OTU535	0	1	0	1	0	0	1	0	0	0	0	0
OTU633	0	0	1	0	0	0	3	1	2	0	0	1
OTU785	1	0	0	0	0	0	1	2	2	0	1	0
OTU401	0	0	0	0	2	0	2	0	0	1	2	0
OTU190	0	2	1	0	0	2	1	1	0	0	0	0
OTU789	0	1	0	0	0	1	0	0	0	33	1	0
OTU874	2	5	0	0	1	1	2	0	1	1	0	1
OTU100	0	2	0	0	0	0	0	0	0	0	0	0
OTU1059	0	0	0	0	0	0	0	0	0	2	3	9
OTU424	0	0	6	3	13	1	0	1	3	0	0	0
OTU926	0	0	1	0	0	0	0	0	0	0	2	0
OTU349	0	0	0	1	0	0	4	0	1	0	0	0
OTU183	37	38	54	17	24	13	15	12	6	8	12	9
OTU871	0	1	5	3	4	5	18	11	29	56	22	10
OTU864	0	1	0	0	1	0	0	1	0	1	0	2
OTU366	0	0	0	0	2	0	0	0	0	0	1	0
OTU155	0	1	1	0	0	0	0	0	1	0	0	0
OTU863	0	0	3	0	0	2	0	0	0	2	0	0
OTU994	0	2	0	0	0	0	1	0	1	0	0	1
